# Supplementary material
Source: MDPI journal article supplement (https://www.mdpi.com/2073-4441/13/20/2822)
Supplement: s1 [file s1 › water-1380831-supplementary.pdf]

## Supplementary Materials

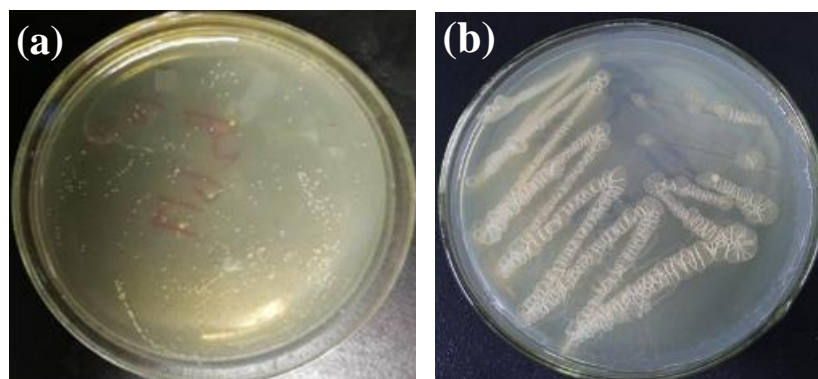

**Figure S1.** The morphological features of functional bacteria: (a) *Brucella* sp (BN3);  
(b) *Bacillus subtilis* (BY2).

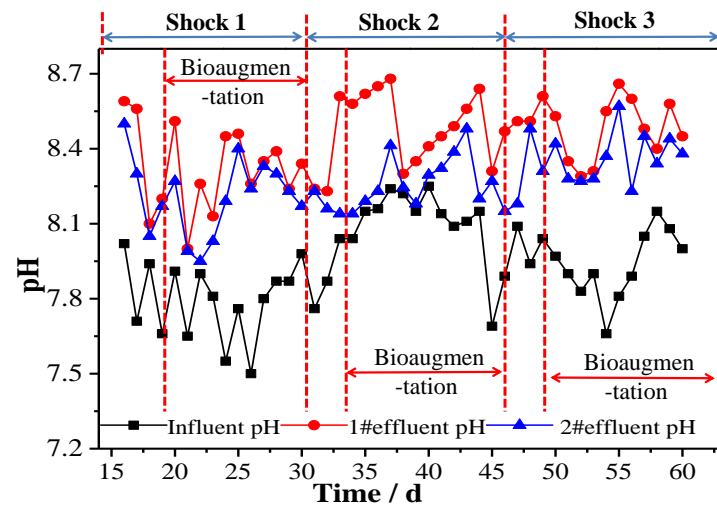

**Figure S2.** Changes of pH in the two ASSBRs during the whole experiment running

**Table S1.** The two ASSBRs process operating schedule

| Operation method                 | ASSBR 1#<br>operating time (min) | ASSBR 2#<br>operating time (min) |
|----------------------------------|----------------------------------|----------------------------------|
| Influent water                   | 60                               | 60                               |
| Aeration                         | 240                              | 240                              |
| Sludge sedimentation             | 60                               | 60                               |
| Open valve                       | 60                               | 60                               |
| Single reactor run time interval | 120                              | 120                              |
| Two reactors run time interval   | 240                              | —                                |

Note: Two ASSBRs are circularly operated every 8 hours.

**Table S2.** Water samples were collected from different positions in the two ASSBRs

| Experiment number | Sampling position         | Experimental stage |
|-------------------|---------------------------|--------------------|
| W3.1              | 1# ASSBR wastewater       | Initial stage      |
| W3.2              | 1# ASSBR wastewater       |                    |
| W4.1              | 2# ASSBR wastewater       |                    |
| W4.2              | 2# ASSBR wastewater       |                    |
| S3.1              | 1# ASSBR activated sludge |                    |
| S3.2              | 1# ASSBR activated sludge |                    |
| S4.1              | 2# ASSBR activated sludge |                    |
| S4.2              | 2# ASSBR activated sludge |                    |
| TW.1              | 2# ASSBR wastewater       | Shock 1            |
| TW.2              | 2# ASSBR wastewater       |                    |
| TS.1              | 2# ASSBR activated sludge |                    |
| TS.2              | 2# ASSBR activated sludge |                    |
| TW.3              | 2# ASSBR wastewater       | Shock 2            |
| TW.4              | 2# ASSBR wastewater       |                    |
| TS.3              | 2# ASSBR activated sludge |                    |
| TS.4              | 2# ASSBR activated sludge |                    |
| YW.1              | 2# ASSBR wastewater       | Shock 3            |
| YW.2              | 2# ASSBR wastewater       |                    |
| YS.1              | 2# ASSBR activated sludge |                    |
| YS.2              | 2# ASSBR activated sludge |                    |

Note: To ensure the accuracy of the data, take two samples at each position.
